1 **Rare earth element (REE)-dependent growth of *Pseudomonas putida***  
2 **KT2440 depends on the ABC-transporter PedA1A2BC and is**  
3 **influenced by iron availability**

4 Matthias Wehrmann<sup>a</sup>, Charlotte Berthelot<sup>b,c</sup>, Patrick Billard<sup>b,c,#</sup>, Janosch Klebensberger<sup>a#</sup>

5

6 <sup>a</sup>*University of Stuttgart, Institute of Biochemistry and Technical Biochemistry, Department of*  
7 *Technical Biochemistry, Stuttgart, Germany*

8

9 <sup>b</sup>*Université de Lorraine, LIEC UMR7360, Faculté des Sciences et Technologies, Vandoeuvre-lès-*  
10 *Nancy, France*

11

12 <sup>c</sup>*CNRS, LIEC UMR7360, Faculté des Sciences et Technologies, Vandoeuvre-lès-Nancy, France*

13

14 Running title: Rare earth element uptake and interference in *Pseudomonas putida* KT2440

15

16 #Address correspondence to Janosch Klebensberger ([janosch.klebensberger@itb.uni-stuttgart.de](mailto:janosch.klebensberger@itb.uni-stuttgart.de))

17 and Patrick Billard ([patrick.billard@univ-lorraine.fr](mailto:patrick.billard@univ-lorraine.fr))

18 Keywords: Lanthanides, rare earth elements, ABC-transporter, *Pseudomonas putida*, PQQ, PedE,

19 PedH, mismetallation, dehydrogenases

20 **Abstract**

21 In the soil-dwelling organism *Pseudomonas putida* KT2440, the rare earth element (REE)-  
22 utilizing and pyrroloquinoline quinone (PQQ)-dependent ethanol dehydrogenase PedH is part of  
23 a periplasmic oxidation system that is vital for growth on various alcoholic volatiles. Expression  
24 of PedH and its Ca<sup>2+</sup>-dependent counterpart PedE is inversely regulated in response to lanthanide  
25 (Ln<sup>3+</sup>) bioavailability, a mechanism termed the REE-switch. In the present study, we demonstrate  
26 that copper, zinc, and in particular, iron availability influences this regulation in a pyoverdine-  
27 independent manner by increasing the minimal Ln<sup>3+</sup> concentration required for the REE-switch to  
28 occur by several orders of magnitude. A combined genetic- and physiological approach reveals  
29 that an ABC-type transporter system encoded by the gene cluster *pedA1A2BC* is essential for  
30 efficient growth with low (nanomolar) Ln<sup>3+</sup> concentrations. In the absence of *pedA1A2BC*, a  
31 ~100-fold higher La<sup>3+</sup> concentration is needed for PedH-dependent growth but not for the ability  
32 to repress growth based on PedE activity. From these results, we conclude that cytoplasmic  
33 uptake of lanthanides through PedA1A2BC is essential to facilitate REE-dependent growth under  
34 environmental conditions with poor REE bioavailability. Our data further suggest that the  
35 La<sup>3+</sup>/Fe<sup>3+</sup> ratio impacts the REE-switch through the mismetallation of putative La<sup>3+</sup>-binding  
36 proteins, such as the sensor histidine kinase PedS2, in the presence of high iron concentrations.  
37 As such, this study provides an example for the complexity of bacteria-metal interactions and  
38 highlights the importance of medium compositions when studying physiological traits *in vitro* in  
39 particular in regards to REE-dependent phenomena.

## 40 **Introduction**

41 Metal ions are essential for all living organisms as they play important roles in stabilizing  
42 macromolecular cellular structures, by catalyzing biochemical reactions or acting as cofactors for  
43 enzymes (Gray, 2003; Merchant and Helmann, 2012). They can, however, also be toxic to cells at  
44 elevated levels through the generation of reactive oxygen species or by aspecific interactions such  
45 as mismetallation (Cornelis et al., 2011; Dixon and Stockwell, 2014; Foster et al., 2014). Bacteria  
46 have hence developed a sophisticated toolset to maintain cellular metal homeostasis (Andrews et  
47 al., 2003; Chandrangu et al., 2017; Schalk and Cunrath, 2016; Semrau et al., 2018). Common  
48 mechanisms include release of metal-specific scavenger molecules, the activation of high-affinity  
49 transport systems, the production of metal storage proteins, and the expression of specific efflux  
50 pumps.

51 As it is the case for all strictly aerobic bacteria, the soil-dwelling organism *Pseudomonas putida*  
52 KT2440 has a high demand for iron but faces the challenge that the bioavailability of this metal is  
53 very poor under most toxic environmental conditions due to the fast oxidation of  $\text{Fe}^{2+}$ - and the  
54 low solubility of  $\text{Fe}^{3+}$ -species (Andrews et al., 2003). One strategy of many bacteria to overcome  
55 this challenge is to excrete self-made peptide-based siderophores (such as pyoverdines) into the  
56 environment that bind  $\text{Fe}^{3+}$  with high affinity, and thereby increase its bioavailability (Baune et  
57 al., 2017; Cornelis and Andrews, 2010; Salah El Din et al., 1997). A second adaptation of *P.*  
58 *putida* cells to iron-limitation is a change in the proteomic inventory in order to limit the use of  
59 Fe-containing enzymes, exemplified by the switch from the Fe-dependent superoxide dismutase  
60 (SOD) to a Mn-dependent isoenzyme or by re-routing of entire metabolic pathways (Kim et al.,  
61 1999; Sasnow et al., 2016). In contrast, when Fe bioavailability is high, the production of the  
62 bacterioferritins Bfr $\alpha$  and Bfr $\beta$  is increased to enable intracellular storage and thereby improve  
63 cellular fitness under potential future conditions of iron starvation (Chen et al., 2010). The

64 regulatory mechanisms for metal homeostasis of *P. putida* cells in response to other essential  
65 metal ions such as Co, Cu, Mg, Mo, Ni, and Zn are less well explored. Genes encoding for  
66 transport systems associated with the uptake and efflux of these metals can, however, be found in  
67 its genome (Belda et al., 2016; Nelson et al., 2002), and some of these have been studied in more  
68 detail (Miller et al., 2009; Ray et al., 2013).

69 We have recently reported that *P. putida* KT2440 is capable of using rare earth elements (REEs)  
70 of the lanthanide series ( $\text{Ln}^{3+}$ ) when growing on several alcoholic substrates (Wehrmann et al.,  
71 2017, 2019). Under these conditions, the cells use the pyrroloquinoline quinone (PQQ)-  
72 dependent ethanol dehydrogenase (EDH) PedH, to catalyze their initial oxidation within the  
73 periplasm. Like many other organism, *P. putida* harbors an additional,  $\text{Ln}^{3+}$ -independent  
74 functional homologue of PedH termed PedE that depends on a  $\text{Ca}^{2+}$  ion as metal cofactor (Takeda  
75 et al., 2013; Wehrmann et al., 2017). Depending on the availability of REEs in the environment,  
76 *P. putida* tightly regulates PedE and PedH production (Wehrmann et al. 2017, 2018). In the  
77 absence of  $\text{Ln}^{3+}$ , growth is solely dependent on PedE whereas PedH transcription is repressed.  
78 The situation immediately changes in the presence of small amounts of  $\text{Ln}^{3+}$  (low nM range)  
79 leading to a strong induction of the  $\text{Ln}^{3+}$ -dependent enzyme PedH and repression of its  $\text{Ca}^{2+}$ -  
80 dependent counterpart PedE. For *P. putida* KT2440 the PedS2/PedR2 two component system  
81 (TCS) is a central component of this inverse regulation (Wehrmann et al., 2018). Notably, the  
82 REE-switch in *P. putida* was also found to be influenced by environmental conditions, as the  
83 critical  $\text{La}^{3+}$  concentrations required to support PedH-dependent growth differs dramatically  
84 depending on the medium used, ranging from 5 nM up to 10  $\mu\text{M}$  (Wehrmann et al., 2017).

85 Lanthanides are only poorly available in natural environments (often picomolar concentrations)  
86 due to the formation of low soluble hydroxide and/or phosphate (Firsching and Brune, 1991;  
87 Meloche and Vrátný, 1959). The presence of active uptake systems to facilitate REE-dependent

88 growth in bacteria has thus been favored by many researchers (Aide and Aide, 2012; Cotruvo et  
89 al., 2018; Gu et al., 2016; Gu and Semrau, 2017; Markert, 1987; Picone and Op den Camp, 2019;  
90 Tyler, 2004). A transcriptomic study of *M. trichosporium* OB3b cells observed that multiple  
91 genes encoding for different active transport systems were among the most regulated in the  
92 presence of cerium (Gu and Semrau, 2017). In addition to these findings, it has been found that a  
93 specific TonB-dependent receptor protein as well as a TonB-like transporter protein are highly  
94 conserved in bacteria that carry genes encoding for Ln<sup>3+</sup>-dependent MDHs (Keltjens et al., 2014;  
95 Wu et al., 2015). Only very recently, different studies indeed identified both an ABC-transporter  
96 and TonB-dependent receptor proteins that are needed for REE-dependent growth of methano-  
97 and methylotrophs, strongly suggesting the existence of an uptake system that specifically  
98 transports a Ln<sup>3+</sup>-chelator complex in these organisms (Groom et al., 2019; Ochsner et al., 2019;  
99 Roszczenko-Jasińska et al., 2019).

100 With the present study, we show that a homologous ABC-transporter system, encoded by the  
101 gene cluster *pedA1A2BC*, is also essential for lanthanide-dependent growth in the non-  
102 methylotrophic organism *Pseudomonas putida* KT2440 under low (nanomolar) concentrations of  
103 REEs. Notably, no homolog of the TonB-dependent receptor proteins found in methanotrophic or  
104 methylotrophic strains could be identified within the genome of *P. putida* KT2440 indicating  
105 either a lack or substantial differences in the chemical nature of such a Ln<sup>3+</sup>-specific chelator  
106 system. Finally, we show that the siderophore pyoverdine plays no essential role for growth  
107 under low REE concentrations but provide compelling evidence that in addition to Cu<sup>2+</sup> and Zn<sup>2+</sup>  
108 the Fe<sup>2+/3+</sup> to Ln<sup>3+</sup> ratio can significantly alter the REE-switch most likely through  
109 mismetallation.

## 110 **Materials and methods**

### 111 **Bacterial strains, plasmids and culture conditions**

112 The *E. coli* and *P. putida* KT2440 strains and the plasmids used in this study are described in  
113 **Table 1**. Maintenance of strains was routinely performed on solidified LB medium (Maniatis et  
114 al., 1982). If not stated otherwise, strains were grown in liquid LB medium (Maniatis et al., 1982)  
115 or a modified M9 salt medium (Wehrmann et al., 2017) supplemented with 5 mM 2-  
116 phenylethanol, 5 mM 2-phenylacetaldehyde, 5 mM phenylacetic acid, or 25 mM succinate as  
117 carbon and energy source at 28°C to 30°C and shaking. 40 µg mL<sup>-1</sup> kanamycin or 15 µg mL<sup>-1</sup>  
118 gentamycin for *E. coli* and 40 µg mL<sup>-1</sup> kanamycin, 20 µg mL<sup>-1</sup> 5-fluorouracil, or 30 µg mL<sup>-1</sup>  
119 gentamycin for *P. putida* strains was added to the medium for maintenance and selection, if  
120 indicated.

121

### 122 **Liquid medium growth experiments**

123 Liquid growth experiments were performed in biological triplicates by monitoring the optical  
124 density at 600 nm (OD<sub>600</sub>) during growth in modified M9 medium supplemented with the  
125 corresponding carbon and energy sources (see above). For all experiments, washed cells from  
126 overnight cultures grown with succinate at 30°C and 180 rpm shaking were utilized to inoculate  
127 fresh medium with an OD<sub>600</sub> of 0.01 to 0.05. Depending on the culture vessel, the incubation was  
128 carried out in 1 ml medium per well for 96-well 2 ml deep-well plates (Carl Roth) at 350 rpm  
129 shaking and 30°C, or 200 µL medium per well for 96-well microtiter plates (Sarstedt) at 180 rpm  
130 shaking and 28°C. If needed, different concentrations of LaCl<sub>3</sub> (Sigma-Aldrich) were added to  
131 the medium.

132

### 133 **Construction of plasmids**

134 The 600 bp regions upstream and downstream of gene *pvdD*, gene cluster *pedA1A2BC* and genes  
135 *tatC1* and *tatC2* were amplified from genomic DNA of *P. putida* KT2440 using primers pairs  
136 MWH56/MWH57 and MWH58/MWH59, MWH94/MWH95 and MWH96/MWH97,  
137 PBtatC1.1/PBtatC1.2 and PBtatC1.3/PBtatC1.4, and PBtatC2.1/PBtatC2.2 and  
138 PBtatC2.3/PBtatC2.4 to construct the deletion plasmids pMW50, pMW57, pJOE-tatC1 and  
139 pJOE-tatC2 (**Table 2**). The BamHI digested pJOE6261.2 as well as the two up- and downstream  
140 fragments were therefore joined together using one-step isothermal assembly (Gibson, 2011) and  
141 subsequently transformed into *E. coli* BL21(DE3) or TOP10 cells. Sanger sequencing confirmed  
142 the correctness of the plasmids.

143 For measuring promoter activity of *pedE* and *pedH* in vivo, plasmids pTn7-M-pedH-lux and  
144 pTn7-M-pedE-lux were constructed. The DNA regions encompassing the promoters from *pedE*  
145 and *pedH* genes were amplified by PCR using the primer pairs p2674-FSac/p2674-RPst and  
146 p2679-FSac/p2679-RPst (Wehrmann et al., 2017). The PCR products were digested with SacI  
147 and PstI and inserted upstream the *luxCDABE* operon hosted by plasmid pSEVA226. The cargo  
148 module bearing the *pedE-lux* or *pedH-lux* fusion was then passed from the resulting pSEVA226-  
149 based constructs to pTn7-M as PacI/SpeI fragments.

150

## 151 **Strain constructions**

152 For the deletion of chromosomal genes a previously described method for markerless gene  
153 deletions in *P. putida* KT2440 was used (Graf and Altenbuchner, 2011). In short, after  
154 transformation of the integration vectors carrying the up- and downstream region of the target  
155 gene, clones that were kanamycin (Kan) resistant and 5-fluorouracil (5-FU) sensitive were  
156 selected and one clone was incubated in liquid LB medium for 24 h at 30°C and 180 rpm

157 shaking. Upon selection for 5-FU resistance and Kan sensitivity on minimal medium agarose  
158 plates, clones that carried the desired gene deletion were identified by colony PCR.  
159 Integration of the pTn7-M based *pedH-lux* and *pedE-lux* fusions into the chromosome of *P.*  
160 *putida* KT2440 was performed by tetraparental mating using PIR2/pTn7-M-pedH-lux or  
161 PIR2/pTn7-M-pedE-lux as the donor, *E. coli* CC118  $\lambda$ pir/pTNS1 and *E. coli* HB101/pRK600 as  
162 helper strains and appropriate KT2440 strain as the recipient (Zobel et al., 2015). Briefly, cultures  
163 of the four strains grown under selective conditions were mixed, spotted on LB agar and  
164 incubated overnight at 28°C. Transconjugants were selected on cetrimide agar (Sigma-Aldrich)  
165 containing gentamicin. Correct chromosomal integration of mini-Tn7 was checked by colony  
166 PCR using Pput-*glmSDN* and PTn7R primers as described elsewhere (Choi et al., 2005).

167  
168 **Promoter activity assays**  
169 *P. putida* harboring a Tn7-based *pedH-lux* or *pedE-lux* fusion were grown overnight in M9  
170 medium with 25 mM succinate, washed three times in M9 medium with no added carbon source,  
171 and suspended to an OD<sub>600</sub> of 0.1 in the same medium with 1 mM 2-phenylethanol. For  
172 luminescence measurements, 198  $\mu$ l of cell suspension was added to 2  $\mu$ l of a 100-fold-  
173 concentrated metal salt solution in white 96-well plates with a clear bottom ( $\mu$ Clear; Greiner Bio-  
174 One). Microtiter plates were incubated in a FLX-Xenius plate reader (SAFAS, Monaco) at 30°C  
175 with orbital shaking (600 rpm, amplitude 3 mm) and light emission and OD<sub>600</sub> were recorded  
176 after the indicated time periods. Promoter activity was expressed as relative light units (RLU)  
177 normalized to the corresponding OD<sub>600</sub>. Experiments were performed in triplicates, and data are  
178 presented as the mean value with error bars representing the standard deviation.



179 **Results**

180 *Pseudomonas putida* KT2440 makes use of a periplasmic oxidation system to grow on a variety  
181 of alcoholic substrates. Crucial to this system are two PQQ-dependent ethanol dehydrogenases  
182 (PQQ-EDHs), which share a similar substrate scope but differ in their metal cofactor dependency  
183 (Wehrmann *et al.*, 2017). PedE makes use of a Ca<sup>2+</sup>-ion whereas PedH relies on the  
184 bioavailability of different rare earth elements (REE). During our studies, we found that the  
185 critical REE concentration that supports growth based on PedH activity differs dramatically  
186 depending on the minimal medium used. In a modified M9 medium, concentrations of about 10  
187 μM of La<sup>3+</sup> were necessary to observe PedH-dependent growth with 2-phenylethanol while only  
188 about 20-100 nM La<sup>3+</sup> were required in MP medium (Wehrmann *et al.*, 2017). One major  
189 difference between the two minimal media lies in their trace element composition and the  
190 respective metal ion concentrations (**Table 3**). The concentrations of copper, iron, manganese,  
191 and zinc are between 2x and 7x higher in the modified M9 medium compared to MP medium,  
192 and other trace elements such as boron, cobalt, nickel, or tungsten are only present in one out of  
193 the two media. To study the impact of the trace element solution (TES) on growth in the presence  
194 of La<sup>3+</sup>, we used the *ΔpedE* strain growing on 2-phenylethanol in M9 minimal medium in the  
195 presence and absence of TES.

196 While a critical La<sup>3+</sup> concentration of 10 μM or higher was needed in the presence of TES to  
197 support PedH-dependent growth, this concentration dropped to as little as 10 nM La<sup>3+</sup> in the  
198 absence of TES (**Figure 1A**). Similarly, inhibition of PedE-dependent growth by La<sup>3+</sup> in strain  
199 *ΔpedH* differed dramatically depending on the presence of TES (**Figure 1B**). In the presence of  
200 TES, the addition of ≥ 100 μM of La<sup>3+</sup> was required for growth inhibition in the *ΔpedH* strain  
201 within 48 h of incubation, whereas a minimum of only ≥ 1 μM La<sup>3+</sup> was required in the absence  
202 of TES. From these experiments, we conclude that also a non-complemented minimal medium

203 contains low, but sufficient, amounts of essential trace elements to allow growth even in the  
204 absence of TES. To find out whether the trace element mixture or a single trace element was  
205 causing the observed differences, we analyzed the growth of strain  $\Delta pedE$  in more detail (**Figure**  
206 **2A**). For concentrations of  $H_3BO_3$ ,  $NaMoO_4$ ,  $NiSO_4$ , and  $MnCl_2$  similar to those found in  
207 complemented M9 medium, PedH-dependent growth with 2-phenylethanol in the presence of 10  
208 nM  $La^{3+}$  was observed. In contrast, upon the individual supplementation with 4  $\mu M$   $CuSO_4$ , 36  
209  $\mu M$   $FeSO_4$ , or 7  $\mu M$   $ZnSO_4$  PedH-dependent growth could not be observed with 10 nM  $La^{3+}$ , as  
210 it was the case upon the supplementation with TES. Since citrate is used as a metal chelator in  
211 TES, we further tested the impact of citrate on growth inhibition of  $CuSO_4$ ,  $FeSO_4$ , and  $ZnSO_4$   
212 when used as additional supplement (**Figure 2B**). The addition of 50  $\mu M$  of  $Na_3$ -citrate restored  
213 growth of the  $\Delta pedE$  strain in the presence of 4  $\mu M$   $CuSO_4$  and 7  $\mu M$   $ZnSO_4$ , even though cell  
214 growth was still impaired for Zn-containing medium. However, in cultures containing 36  $\mu M$   
215  $FeSO_4$  the addition of citrate had no effect, strongly indicating that  $FeSO_4$  is predominantly  
216 responsible for the inhibition of PedH-dependent growth of the  $\Delta pedE$  strain under low  $La^{3+}$   
217 concentrations in a TES complemented M9 medium.

218 To acquire iron under restricted conditions, *P. putida* KT2440 can excrete two variants of the  
219 siderophore pyoverdine (Salah El Din et al., 1997). Beside their great specificity towards  $Fe^{3+}$ ,  
220 different pyoverdines can also chelate other ions including  $Al^{3+}$ ,  $Cu^{2+}$ ,  $Eu^{3+}$ , or  $Tb^{3+}$ , although  
221 with lower affinity (Braud et al., 2009a, 2009b). To test whether pyoverdine production in  
222 response to low iron conditions facilitates growth under low  $La^{3+}$  conditions, the mutant strain  
223  $\Delta pedE \Delta pvdD$  was constructed. This strain is no longer able to produce the two pyoverdines due  
224 to the loss of the non-ribosomal peptide synthetase *pvdD* (PP\_4219; formerly known as *ppsD*)  
225 (Matilla et al., 2007), which was confirmed upon growth on agar plates (**Figure 3C**). In  
226 experiments with varying  $FeSO_4$  supplementation, we found that PedH-dependent growth of

227 strain  $\Delta pedE$  was only observed for  $FeSO_4$  concentrations  $\leq 10 \mu M$  under low (10 nM)  $La^{3+}$   
228 conditions (**Figure 3A**). With  $\geq 20 \mu M$   $FeSO_4$  in the medium, no growth was observed. Strain  
229  $\Delta pedE \Delta pvdD$  exhibited the same  $FeSO_4$ -dependent growth phenotype as the parental strain  
230 under low  $La^{3+}$  concentrations. Under high (10  $\mu M$ )  $La^{3+}$  conditions, strain  $\Delta pedE$  exhibited  
231 PedH-dependent growth under any tested  $FeSO_4$  concentration (**Figure 3B**). Notably, strain  
232  $\Delta pedE \Delta pvdD$  showed nearly the same growth pattern as  $\Delta pedE$  under high  $La^{3+}$  concentrations,  
233 with the exception of the condition where no  $FeSO_4$  was added to the medium. Under this  
234 condition, no growth was observed.

235 From these data, it can be speculated that beside the PedH-dependent growth also the inhibition  
236 of PedE-dependent growth is dependent on the  $FeSO_4$  to  $La^{3+}$  ratio. In the presence of 10 nM  
237  $La^{3+}$ ,  $pedE$  promoter activity was comparably high and increased with increasing  $FeSO_4$   
238 concentrations. In addition, strain  $\Delta pedH$  grew readily on 2-phenylethanol under all these  
239 conditions even with no  $FeSO_4$  supplementation (**Figure 4A**). When 10  $\mu M$   $La^{3+}$  was available,  
240 no growth of the  $\Delta pedH$  mutant was observed in presence of  $\leq 20 \mu M$   $FeSO_4$  and the  $pedE$   
241 promoter activities were low (**Figure 4B**). However, when 40  $\mu M$   $FeSO_4$  were present in the  
242 medium, representing a 4-fold excess compared to  $La^{3+}$ , PedE-dependent growth and an  
243 increased  $pedE$  promoter activity was detected.

244 Due to the very low concentrations of REEs (nM range) required for REE-dependent growth it is  
245 commonly speculated that specific REE uptake systems must exist. From our previous results, we  
246 can conclude that pyoverdine is not such a system. A search of the genomic context of the  $ped$   
247 gene cluster identified a putative ABC transporter system located nearby the two PQQ-EDHs  
248 encoding genes  $pedE$  and  $pedH$  (**Figure 5A**). The ABC-transporter is predicted to be encoded as  
249 a single transcript by the online tool “Operon-mapper” (Taboada et al., 2018). It consists of four  
250 genes encoding a putative permease ( $pedC$  [PP\_2667]), an ATP-binding protein ( $pedB$

251 [PP\_2668]), a YVTN beta-propeller repeat protein of unknown function (*pedA2* [PP\_2669]) and  
252 a periplasmic substrate-binding protein (*pedA1* [PP\_5538]). While efflux systems are usually  
253 composed of the transmembrane domains and nucleotide binding domains, ABC-dependent  
254 import system additionally require a substrate binding protein for functional transport (Biemans-  
255 Oldehinkel et al., 2006). As the gene *pedA1* is predicted to be such a substrate binding protein, it  
256 is very likely that this transporter represents an import system.

257 ABC-dependent importers can be specific for carbon substrates or metal ions. Growth  
258 experiments with  $\Delta pedE$ ,  $\Delta pedH$ ,  $\Delta pedE \Delta pedA1A2BC$ , and  $\Delta pedH \Delta pedA1A2BC$  demonstrated  
259 that independent of  $La^{3+}$  (100  $\mu M$ ) availability, all strains were capable of growing with the  
260 oxidized degradation intermediates of 2-phenylethanol, namely 2-phenylacetaldehyde and  
261 phenylacetic acid, to a similar  $OD_{600}$  within 48 h of incubation (**Figure 5B**), indicating that the  
262 transport system is not involved in carbon substrate uptake.

263 When subsequently different  $La^{3+}$  concentrations were tested in a similar setup, we found that  
264 PedH-dependent growth on 2-phenylethanol of strain  $\Delta pedE \Delta pedA1A2BC$  was inhibited for the  
265 first 48 h of incubation under all concentrations tested, irrespectively of the presence or absence  
266 of TES (**Figure 6A**). This was in contrast to the  $\Delta pedE$  deletion strain, which grew in the  
267 presence of  $\geq 10$  nM  $La^{3+}$  or  $\geq 10$   $\mu M$   $La^{3+}$  depending on TES availability (**Figure 1A; Figure**  
268 **6A** pale symbols and lines). Upon an increased incubation time of 120 h, however, strain  $\Delta pedE$   
269  $\Delta pedA1A2BC$  eventually did grow with 1 and 10  $\mu M$   $La^{3+}$  or 100  $\mu M$   $La^{3+}$  depending on TES  
270 addition (**Figure 6B**). Notably, beside the substantial difference in lag-phase, also the critical  
271 REE concentration for PedH-dependent growth of  $\Delta pedE \Delta pedA1A2BC$  was increased by 100-  
272 fold compared to the  $\Delta pedE$  strain under all conditions tested. Assuming that PedA1A2BC is  
273 specific for REE uptake, growth with the  $Ca^{2+}$ -dependent enzyme PedE should not be influenced  
274 by a loss of the transporter function. When we tested the  $\Delta pedH$  and  $\Delta pedH \Delta pedA1A2BC$  strain,

275 we indeed could not find any difference in growth as both strains exhibited a similar inhibition  
276 pattern for concentrations  $\geq 1 \mu\text{M La}^{3+}$  or  $\geq 100 \mu\text{M La}^{3+}$  depending on the absence or presence  
277 of TES in the medium (**Figure 6C**).

278 ABC-transporter systems, or the transported compounds, can be involved in transcriptional  
279 regulation of specific target genes (Biemans-Oldehinkel et al., 2006). Thus, the impaired growth  
280 under low  $\text{La}^{3+}$  concentrations of the  $\Delta pedE \Delta pedA1A2BC$  strain might be caused by the lack of  
281 transcriptional activation of the *pedH* gene. To test this hypothesis, strain  $\Delta pedE \Delta pedH$   
282  $\Delta pedA1A2BC$  was complemented with a *pedH* gene independent of its natural promoter.  
283 Phenotypic analysis of this strain with 2-phenylethanol in the presence of TES and varying  $\text{La}^{3+}$   
284 concentrations revealed no difference in the growth pattern when compared to strain  $\Delta pedE$   
285  $\Delta pedA1A2BC$  (**Figure 6D**). This indicated that the impaired growth phenotype of the ABC-  
286 transporter mutant is not due to a lack of transcriptional activation of *pedH*. To further validate  
287 this conclusion, *pedH* promoter activities were measured during incubation with 2-phenylethanol  
288 in strain  $\Delta pedA1A2BC$  and its parental strain in the absence and presence of  $10 \mu\text{M La}^{3+}$  (**Figure**  
289 **7A**). Both strains showed a similar and more than 20 fold increased *pedH* promoter activity in  
290 response to  $\text{La}^{3+}$  supplementation (26-fold for  $\text{KT2440}^{*}::\text{Tn7-}pedH\text{-lux}$  and 23-fold in  
291  $\Delta pedA1A2BC::\text{Tn7-}pedH\text{-lux}$ ).

292 In contrast to PedE, the signal peptide of PedH contains two adjacent arginine residues, which is  
293 an indication that it might be transported to the periplasm in a folded state via the Tat (twin-  
294 arginine translocation) protein translocation system (Berks, 2015). Therefore, one could argue  
295 that the transport of lanthanides into the cytoplasm might be beneficial as the incorporation into  
296 the active site of PedH could be more efficient during protein folding compared to the  
297 complementation of the apoenzyme in the periplasm. An initial analysis of the PedH signal  
298 peptide using different online software tools (TatP, PRED-TAT, SignalP 5.0, TatFind) could

299 neither confirm nor refute this hypothesis (Almagro Armenteros et al., 2019; Bagos et al., 2010;  
300 Bendtsen et al., 2005; Rose et al., 2002). Therefore, we generated strains  $\Delta pedE \Delta tatC1$  and  
301  $\Delta pedE \Delta tatC2$  in which the two individual TatC proteins (TatC1 [PP\_1039] and TatC2  
302 [PP\_5018]) encoded in the genome of KT2440 are deleted. These strains should be restricted in  
303 the translocation of folded proteins into the periplasm, and if PedH would represent a Tat  
304 substrate, impaired growth on 2-phenylethanol in the presence of  $La^{3+}$  should be observable.  
305 However, neither *tatC1* nor *tatC2* mutation affected  $La^{3+}$ -dependent growth on 2-phenylethanol  
306 (**Figure 7B**). Additionally, various attempts to generate the double *tatC1/C2* mutant strain were  
307 unsuccessful.

## 308 **Discussion**

309 In the present study, we reveal that iron availability severely affects the REE-switch in  
310 *Pseudomonas putida* KT2440. This is evidenced by the reduction of the critical concentration of  
311  $\text{La}^{3+}$  that is required both to promote PedH-dependent growth and for the repression of growth  
312 based on PedE activity. By using a  $\Delta pvdD$  deletion strain, we demonstrate that the production of  
313 the iron chelating siderophore pyoverdine is not required for PedH-dependent growth under low  
314  $\text{La}^{3+}$  conditions. Our data suggest that the observed effects during high  $\text{Fe}^{2+/3+}/\text{La}^{3+}$  ratios are  
315 caused by mismetallation. In this scenario, the  $\text{La}^{3+}$ -binding sites of proteins could be occupied  
316 by  $\text{Fe}^{2+/3+}$  ions that are in excess in the medium, and can also be present in the same 3+ oxidation  
317 state (Foster et al., 2014; Tottey et al., 2008; Tripathi and Srivastava, 2006; Webb, 1970).  
318 Transcriptional data show that *pedE* repression can be influenced by iron in a concentration  
319 dependent manner. Further, the impact of iron is not identical for PedE and PedH-dependent  
320 growth (100 fold vs. 1000 fold). Since PedE regulation is solely dependent on PedS2 (Wehrmann  
321 et al., 2017; 2018), these data are thus supportive of such a mismetallation hypothesis, assuming  
322 that the sensor histidine kinase PedS2 and PedH have different binding affinities to  $\text{La}^{3+}$  and/or  
323  $\text{Fe}^{2+/3+}$ .

324 The same hypothesis might similarly explain why under high  $\text{La}^{3+}$  concentrations in the absence  
325 of  $\text{Fe}^{3+}$  supplementation, a pyoverdine-deficient strain is strongly impaired in growth. In this  
326 scenario the  $\text{Fe}^{2+/3+}$  binding sites of pyoverdine-independent Fe transporters, such as the  
327 ferrichrome, ferrioxamine and ferric citrate uptake systems, might be occupied by  $\text{La}^{3+}$  and  
328 prevent binding of  $\text{Fe}^{2+/3+}$  ions (Cornelis, 2010; Jurkevitch et al., 1992). Consequently, a  
329 pyoverdine deficient strain would be unable to take up enough of this essential element that is,  
330 most likely, present at trace levels in the medium even without additional supplementation.

331 It is further interesting to point out that also micromolar  $\text{Cu}^{2+}$  and  $\text{Zn}^{2+}$  inhibited growth in  
332 presence of  $\text{La}^{3+}$  in the nanomolar range, although these metals do not exist in the same 3+  
333 oxidation state under natural conditions. They are, however, the divalent transition metals that  
334 form the most stable complexes irrespective of the nature of the ligand, and as such also  
335 competitively bind non-cognate metal binding sites with high strength (Foster et al., 2014; Irving  
336 and Williams, 1953). Notably,  $\text{Cu}^{2+}$  has also been reported to interfere with REE-dependent  
337 regulation of PQQ-dependent methanol dehydrogenases in *M. trichosporium* OB3b (Gu et al.,  
338 2016; Gu and Semrau, 2017), and it is tempting to speculate that mismetallation might be  
339 involved in this process, too.

340 We provide compelling evidence that the predicted ABC-transporter PedA1A2BC is essential for  
341 PedH-dependent growth under low concentrations of  $\text{La}^{3+}$ . Based on the PedE-dependent growth  
342 phenotype, we can further show that PedA1A2BC is not involved in transcriptional repression of  
343 *pedE* under low  $\text{La}^{3+}$ -conditions. The fact that a  $\Delta pedE \Delta pedA1A2BC$  mutant strain can only  
344 grow with a 100-fold higher concentration of  $\text{La}^{3+}$  compared to the  $\Delta pedE$  single mutant strongly  
345 indicates that PedA1A2BC functions as a  $\text{La}^{3+}$ -specific importer into the cytoplasm. In very  
346 recent studies it was demonstrated that in several *Methylobacterium extorquens* strains a similar  
347 ABC-transporter system is required for  $\text{Ln}^{3+}$ -dependent growth (Ochsner et al., 2019;  
348 Roszczenko-Jasińska et al., 2019). A BLAST analysis revealed that these ABC transporters show  
349 high similarities to all four genes of the *pedA1A2BC* operon (>43% sequence identity for *pedA2*  
350 and >50% for *pedA1*, *pedB* and *pedC*) and that all bacterial strains that have been reported to  
351 produce  $\text{Ln}^{3+}$ -dependent PQQ-ADHs thus far, carry homologues of this transporter system in  
352 their genome. Using a protein-based fluorescent sensor with picomolar affinity for REEs,  
353 Mattocks *et al.* were able to demonstrate that *M. extorquens* indeed selectively takes up light  
354 REEs into its cytoplasm (Mattocks et al., 2019) and it was later shown that cytoplasmic REE-



355 uptake depends on the presence of the previously identified ABC-transporter system  
356 (Roszczenko-Jasińska et al., 2019).

357 Since the PedH enzyme, like all currently known Ln<sup>3+</sup>-dependent enzymes, resides in the  
358 periplasm and since the purified apoenzyme of PedH can be converted into the catalytically  
359 active holoenzyme by Ln<sup>3+</sup> supplementation *in vitro*, the question arises what the potential  
360 advantage of the postulated cytoplasmic Ln<sup>3+</sup> uptake for *P. putida* would be. From our point of  
361 view, two different reasons can be imagined, namely that *i*) the REE-dependent PedH protein is  
362 folded within the cytoplasm and the incorporation of the La<sup>3+</sup>-cofactor is only possible or more  
363 efficient during the folding process; or *ii*) La<sup>3+</sup> binds to a cytoplasmic protein that either  
364 represents a so-far uncharacterized transcriptional regulator or another REE-dependent enzyme.

365 It has been demonstrated that the location of protein folding can regulate metal binding (Tottey et  
366 al., 2008). As such, Ln<sup>3+</sup> insertion during folding in the cytoplasm, where metal concentrations  
367 are tightly regulated, could provide a means of preventing the Ln<sup>3+</sup> binding site of PedH from  
368 mismetallation with potentially competitive binders such as Cu<sup>2+</sup>, Zn<sup>2+</sup>, or Fe<sup>2+/3+</sup> in the  
369 periplasm. However, we could not find evidence that PedH is a Tat substrate and consequently  
370 transported into the periplasm as a folded protein (Berks, 2015), as the *tatC1* or *tatC2* mutants  
371 both still showed PedH-dependent growth. However, it cannot be excluded that the two Tat  
372 systems are functionally redundant since attempts to generate a *tatC1/C2* double mutant strain  
373 proved unsuccessful.

374 We can further conclude that the putative La<sup>3+</sup> transport into the cytoplasm is not required to  
375 activate *pedH* transcription. It is however possible that additional genes/proteins required for  
376 PedH-dependent growth rely on, or are regulated by, the cytoplasmic presence of REEs. In this  
377 context it is interesting to note that in a recent proteomic approach, we found that besides PedE  
378 and PedH, additional proteins of unknown function show differential abundance in response to

379 La<sup>3+</sup> availability (Wehrmann et al., 2019). It will hence be interesting to find out in future studies  
380 whether any of these proteins is required for PedH function.

381 In *M. extorquens* PA1 and *M. extorquens* AM1, almost identical TonB-dependent receptor  
382 proteins (>99 % sequence identity) were found to be crucial for REE-dependent growth  
383 suggesting a specific Ln<sup>3+</sup>-binding chelator system in these organisms (Ochsner et al., 2019;  
384 Roszczenko-Jasińska et al., 2019). Interestingly, also in *Methylotuvimicrobium buryatense*  
385 5GB1C a TonB-dependent receptor was identified that is crucial for the REE-switch to occur  
386 (Groom et al., 2019). Interestingly, the latter receptor only shows < 20% sequence identity to  
387 those of the *M. extorquens* strains and could thus not have been identified by homology searches.

388 In *P. putida* KT2440, no close homolog to any of the aforementioned TonB-dependent receptors  
389 could be identified (< 30% sequence identity). *P. putida* preferentially resides in the rhizosphere  
390 whereas *M. buryatense* and *M. extorquens* PA1 were isolated from the sediment of a soda lake  
391 (pH 9 – 9.5) and the phyllosphere of *Arabidopsis thaliana*, respectively (Kaluzhnaya et al., 2001;  
392 Knief et al., 2010). One could therefore speculate that a specific Ln<sup>3+</sup>-chelator system is perhaps  
393 not relevant in the rhizosphere due to the large reservoir of REEs within the soil and the usually  
394 acidic environment near the plant roots caused by the secretion of organic acids for phosphate  
395 solubilization (Raghothama and Karthikeyan, 2005; Ramos et al., 2016). The lack of a  
396 homologous TonB-dependent receptor could also be explained by structural differences in the  
397 REE-specific chelator system that might be employed by *P. putida* compared to that of the  
398 methylophilic bacteria. Lastly, it is also possible that in *P. putida* the REE uptake across the  
399 outer membrane proceeds via the same chelator systems that are used for pyoverdine independent  
400 Fe-acquisition. This could further provide another explanation for the impact of the Fe<sup>2+/3+</sup> to  
401 La<sup>3+</sup> ratio on the REE-switch.

402 Overall, the present study expands the crucial role of a conserved ABC-transporter system, which  
403 was very recently identified as Ln<sup>3+</sup>-specific inner membrane transport system in methano- and  
404 methylotrophs, to non-methylotrophic organisms. It further provides new insight into the  
405 complexity of bacterial-metal interactions and demonstrates that Cu, Zn, and in particular Fe ions  
406 can strongly interfere with the REE-switch in *P. putida* most likely through mismetallation. The  
407 body of knowledge how REEs impact protein function, gene regulation, and consequently  
408 physiology of different microorganisms is rapidly increasing. As such, it will be very interesting  
409 to see when some of the most interesting questions, such as the cytoplasmic function of REEs or  
410 the nature and potential structural diversity of specific REE-chelator systems, will be resolved by  
411 future studies.

412 **Funding Information**

413 The work of Matthias Wehrmann and Janosch Klebensberger was supported by an individual  
414 research grant from the Deutsche Forschungsgemeinschaft (DFG, KL 2340/2-1). The work of  
415 Charlotte Berthelot and Patrick Billard was supported by the French National Research Agency  
416 through the National Program “Investissements d’Avenir” with the reference ANR-10-LABX-21-  
417 01/LABEX RESSOURCES21.

418 **Acknowledgements**

419 The authors further declare no conflict of interest. Janosch Klebensberger and Matthias

420 Wehrmann would like to thank Prof. Bernhard Hauer for his continuous support.

421 **References**

- 422 Aide, M. T., and Aide, C. (2012). Rare earth elements: Their importance in understanding soil  
423 genesis. *ISRN Soil Sci.* 2012, 1–11. doi:10.5402/2012/783876.
- 424 Almagro Armenteros, J. J., Tsirigos, K. D., Sønderby, C. K., Petersen, T. N., Winther, O.,  
425 Brunak, S., et al. (2019). SignalP 5.0 improves signal peptide predictions using deep neural  
426 networks. *Nat. Biotechnol.* 37, 420–423. doi:10.1038/s41587-019-0036-z.
- 427 Andrews, S. C., Robinson, A. K., and Rodríguez-Quñones, F. (2003). Bacterial iron  
428 homeostasis. *FEMS Microbiol. Rev.* 27, 215–237. doi:10.1016/S0168-6445(03)00055-X.
- 429 Arias, S., Olivera, E. R., Arcos, M., Naharro, G., and Luengo, J. M. (2008). Genetic analyses and  
430 molecular characterization of the pathways involved in the conversion of 2-  
431 phenylethylamine and 2-phenylethanol into phenylacetic acid in *Pseudomonas putida* U.  
432 *Environ. Microbiol.* 10, 413–432. doi:10.1111/j.1462-2920.2007.01464.x.
- 433 Bagos, P. G., Nikolaou, E. P., Liakopoulos, T. D., and Tsirigos, K. D. (2010). Combined  
434 prediction of Tat and Sec signal peptides with hidden Markov models. *Bioinformatics* 26,  
435 2811–2817. doi:10.1093/bioinformatics/btq530.
- 436 Baune, M., Qi, Y., Scholz, K., Volmer, D. A., and Hayen, H. (2017). Structural characterization  
437 of pyoverdines produced by *Pseudomonas putida* KT2440 and *Pseudomonas taiwanensis*  
438 VLB120. *BioMetals* 30, 589–597. doi:10.1007/s10534-017-0029-7.
- 439 Belda, E., van Heck, R. G. A., José Lopez-Sanchez, M., Cruveiller, S., Barbe, V., Fraser, C., et  
440 al. (2016). The revisited genome of *Pseudomonas putida* KT2440 enlightens its value as a  
441 robust metabolic chassis. *Environ. Microbiol.* 18, 3403–3424. doi:10.1111/1462-  
442 2920.13230.
- 443 Bendtsen, J. D., Nielsen, H., Widdick, D., Palmer, T., and Brunak, S. (2005). Prediction of twin-  
444 arginine signal peptides. *BMC Bioinformatics* 6, 167. doi:10.1186/1471-2105-6-167.

- 445 Berks, B. C. (2015). The Twin-Arginine Protein Translocation Pathway. *Annu. Rev. Biochem.* 84,  
446 843–864. doi:10.1146/annurev-biochem-060614-034251.
- 447 Biemans-Oldehinkel, E., Doeven, M. K., and Poolman, B. (2006). ABC transporter architecture  
448 and regulatory roles of accessory domains. *FEBS Lett.* 580, 1023–1035.  
449 doi:10.1016/j.febslet.2005.11.079.
- 450 Boyer, H. W., and Roulland-Dussoix, D. (1969). A complementation analysis of the restriction  
451 and modification of DNA in *Escherichia coli*. *J. Mol. Biol.* 41, 459–72. doi:10.1038/s41598-  
452 018-31191-1.
- 453 Braud, A., Hannauer, M., Mislin, G. L. A., and Schalk, I. J. (2009a). The *Pseudomonas*  
454 *aeruginosa* pyochelin-iron uptake pathway and its metal specificity. *J. Bacteriol.* 191, 3517–  
455 25. doi:10.1128/JB.00010-09.
- 456 Braud, A., Hoegy, F., Jezequel, K., Lebeau, T., and Schalk, I. J. (2009b). New insights into the  
457 metal specificity of the *Pseudomonas aeruginosa* pyoverdine-iron uptake pathway. *Environ.*  
458 *Microbiol.* 11, 1079–1091. doi:10.1111/j.1462-2920.2008.01838.x.
- 459 Chandrangu, P., Rensing, C., and Helmann, J. D. (2017). Metal homeostasis and resistance in  
460 bacteria. *Nat. Rev. Microbiol.* 15, 338–350. doi:10.1038/nrmicro.2017.15.
- 461 Chen, S., Bleam, W. F., and Hickey, W. J. (2010). Molecular analysis of two bacterioferritin  
462 genes, *bfralpha* and *bfrbeta*, in the model rhizobacterium *Pseudomonas putida* KT2440.  
463 *Appl. Environ. Microbiol.* 76, 5335–43. doi:10.1128/AEM.00215-10.
- 464 Choi, K.-H., Gaynor, J. B., White, K. G., Lopez, C., Bosio, C. M., Karkhoff-Schweizer, R. R., et  
465 al. (2005). A Tn7-based broad-range bacterial cloning and expression system. *Nat. Methods*  
466 2, 443–448. doi:10.1038/nmeth765.
- 467 Cornelis, P. (2010). Iron uptake and metabolism in pseudomonads. *Appl. Microbiol. Biotechnol.*  
468 86, 1637–1645. doi:10.1007/s00253-010-2550-2.

- 469 Cornelis, P., and Andrews, S. C. (2010). Iron uptake and homeostasis in microorganisms. *Caister*  
470 *Acad. Press*, 300.
- 471 Cornelis, P., Wei, Q., Andrews, S. C., and Vinckx, T. (2011). Iron homeostasis and management  
472 of oxidative stress response in bacteria. *Metallomics* 3, 540. doi:10.1039/c1mt00022e.
- 473 Cotruvo, J. A., Featherston, E. R., Mattocks, J. A., Ho, J. V., and Laremore, T. N. (2018).  
474 Lanmodulin: A highly selective lanthanide-binding protein from a lanthanide-utilizing  
475 bacterium. *J. Am. Chem. Soc.* 140, 15056–15061. doi:10.1021/jacs.8b09842.
- 476 Dixon, S. J., and Stockwell, B. R. (2014). The role of iron and reactive oxygen species in cell  
477 death. *Nat. Chem. Biol.* 10, 9–17. doi:10.1038/nchembio.1416.
- 478 Firsching, F. H., and Brune, S. N. (1991). Solubility products of the trivalent rare-earth  
479 phosphates. *J. Chem. Eng. Data* 36, 93–95. doi:10.1021/je00001a028.
- 480 Foster, A. W., Osman, D., and Robinson, N. J. (2014). Metal preferences and metallation. *J. Biol.*  
481 *Chem.* 289, 28095–103. doi:10.1074/jbc.R114.588145.
- 482 Gibson, D. G. (2011). Enzymatic assembly of overlapping DNA fragments. *Methods Enzymol.*  
483 498, 349–61. doi:10.1016/B978-0-12-385120-8.00015-2.
- 484 Graf, N., and Altenbuchner, J. (2011). Development of a method for markerless gene deletion in  
485 *Pseudomonas putida*. *Appl. Environ. Microbiol.* 77, 5549–5552. doi:10.1128/AEM.05055-  
486 11.
- 487 Gray, H. B. (2003). Biological inorganic chemistry at the beginning of the 21st century. *Proc.*  
488 *Natl. Acad. Sci.* 100, 3563–3568. doi:10.1073/pnas.0730378100.
- 489 Groom, J., Ford, S. M., Pesesky, M. W., and Lidstrom, M. E. (2019). A mutagenic screen  
490 identifies a TonB-dependent receptor required for the lanthanide metal switch in the Type I  
491 methanotroph *Methylovumicrobium buryatense* 5GB1C. *J. Bacteriol.*  
492 doi:10.1128/JB.00120-19.



- 493 Gu, W., Farhan Ul Haque, M., DiSpirito, A. A., and Semrau, J. D. (2016). Uptake and effect of  
494 rare earth elements on gene expression in *Methylosinus trichosporium* OB3b. *FEMS*  
495 *Microbiol. Lett.* 363, fnw129. doi:10.1093/femsle/fnw129.
- 496 Gu, W., and Semrau, J. D. (2017). Copper and cerium-regulated gene expression in *Methylosinus*  
497 *trichosporium* OB3b. *Appl. Microbiol. Biotechnol.* 101, 8499–8516. doi:10.1007/s00253-  
498 017-8572-2.
- 499 Herrero, M., de Lorenzo, V., and Timmis, K. N. (1990). Transposon vectors containing non-  
500 antibiotic resistance selection markers for cloning and stable chromosomal insertion of  
501 foreign genes in gram-negative bacteria. *J. Bacteriol.* 172, 6557–6567.  
502 doi:10.1128/jb.172.11.6557-6567.1990.
- 503 Irving, H., and Williams, R. J. P. (1953). 637. The stability of transition-metal complexes. *J.*  
504 *Chem. Soc.*, 3192. doi:10.1039/jr9530003192.
- 505 Jurkevitch, E., Hadar, Y., Chen, Y., Libman, J., and Shanzer, A. (1992). Iron uptake and  
506 molecular recognition in *Pseudomonas putida*: receptor mapping with ferrichrome and its  
507 biomimetic analogs. *J. Bacteriol.* 174, 78–83. doi:10.1099/13500872-140-7-1697.
- 508 Kaluzhnaya, M., Khmelenina, V., Eshinimaev, B., Suzina, N., Nikitin, D., Solonin, A., et al.  
509 (2001). Taxonomic characterization of new alkaliphilic and alkalitolerant methanotrophs  
510 from Soda Lakes of the southeastern Transbaikal region and description of  
511 *Methylomicrobium buryatense* sp.nov. *Syst. Appl. Microbiol.* 24, 166–176.  
512 doi:10.1078/0723-2020-00028.
- 513 Keen, N. T., Tamaki, S., Kobayashi, D., and Trollinger, D. (1988). Improved broad-host-range  
514 plasmids for DNA cloning in Gram-negative bacteria. *Gene* 70, 191–197. doi:10.1016/0378-  
515 1119(88)90117-5.
- 516 Keltjens, J. T., Pol, A., Reimann, J., and Op den Camp, H. J. M. (2014). PQQ-dependent

- 517           methanol dehydrogenases: rare-earth elements make a difference. *Appl. Microbiol.*  
518           *Biotechnol.* 98, 6163–83. doi:10.1007/s00253-014-5766-8.
- 519   Kim, Y. C., Miller, C. D., and Anderson, A. J. (1999). Transcriptional regulation by iron of genes  
520           encoding iron- and manganese-superoxide dismutases from *Pseudomonas putida*. *Gene* 239,  
521           129–135. doi:10.1016/S0378-1119(99)00369-8.
- 522   Knief, C., Frances, L., and Vorholt, J. A. (2010). Competitiveness of diverse *Methylobacterium*  
523           strains in the phyllosphere of *Arabidopsis thaliana* and identification of representative  
524           models, including *M. extorquens* PA1. *Microb. Ecol.* 60, 440–52. doi:10.1007/s00248-010-  
525           9725-3.
- 526   Maniatis, T., Fritsch, E., Sambrook, J., and Laboratory, C. S. H. (1982). *Molecular Cloning* □: *A*  
527           *Laboratory Manual*. Cold Spring Harbor, N.Y. Cold Spring Harbor Laboratory.
- 528   Markert, B. (1987). The pattern of distribution of lanthanide elements in soils and plants.  
529           *Phytochemistry* 26, 3167–3170. doi:10.1016/S0031-9422(00)82463-2.
- 530   Matilla, M. A., Ramos, J. L., Duque, E., de Dios Alché, J., Espinosa-Urgel, M., and Ramos-  
531           González, M. I. (2007). Temperature and pyoverdine-mediated iron acquisition control  
532           surface motility of *Pseudomonas putida*. *Environ. Microbiol.* 9, 1842–1850.  
533           doi:10.1111/j.1462-2920.2007.01286.x.
- 534   Mattocks, J. A., Ho, J. V., and Cotruvo, J. A. (2019). A selective, protein-based fluorescent  
535           sensor with picomolar affinity for rare earth elements. *J. Am. Chem. Soc.* 141, 2857–2861.  
536           doi:10.1021/jacs.8b12155.
- 537   Meloche, C. C., and Vrátný, F. (1959). Solubility product relations in the rare earth hydrous  
538           hydroxides. *Anal. Chim. Acta* 20, 415–418. doi:10.1016/0003-2670(59)80090-8.
- 539   Merchant, S. S., and Helmann, J. D. (2012). Elemental economy: microbial strategies for  
540           optimizing growth in the face of nutrient limitation. *Adv. Microb. Physiol.* 60, 91–210.

- 541       doi:10.1016/B978-0-12-398264-3.00002-4.
- 542   Miller, C. D., Pettee, B., Zhang, C., Pabst, M., McLean, J. E., and Anderson, A. J. (2009). Copper  
543       and cadmium: responses in *Pseudomonas putida* KT2440. *Lett. Appl. Microbiol.* 49, 775–  
544       783. doi:10.1111/j.1472-765X.2009.02741.x.
- 545   Mückschel, B., Simon, O., Klebensberger, J., Graf, N., Rosche, B., Altenbuchner, J., et al.  
546       (2012). Ethylene glycol metabolism by *Pseudomonas putida*. *Appl. Environ. Microbiol.* 78,  
547       8531–9. doi:10.1128/AEM.02062-12.
- 548   Nelson, K. E., Weinel, C., Paulsen, I. T., Dodson, R. J., Hilbert, H., Martins dos Santos, V. A. P.,  
549       et al. (2002). Complete genome sequence and comparative analysis of the metabolically  
550       versatile *Pseudomonas putida* KT2440. *Environ. Microbiol.* 4, 799–808.  
551       doi:10.1046/j.1462-2920.2002.00366.x.
- 552   Ochsner, A. M., Hemmerle, L., Vonderach, T., Nüssli, R., Bortfeld-Miller, M., Hattendorf, B., et  
553       al. (2019). Use of rare-earth elements in the phyllosphere colonizer *Methylobacterium*  
554       *extorquens* PA1. *Mol. Microbiol.*, 0–2. doi:10.1111/mmi.14208.
- 555   Picone, N., and Op den Camp, H. J. M. (2019). Role of rare earth elements in methanol  
556       oxidation. *Curr. Opin. Chem. Biol.* 49, 39–44. doi:10.1016/j.cbpa.2018.09.019.
- 557   Raghothama, K. G., and Karthikeyan, A. S. (2005). Phosphate acquisition. *Plant Soil* 274, 37–49.  
558       doi:10.1007/s11104-004-2005-6.
- 559   Ramos, S. J., Dinali, G. S., Oliveira, C., Martins, G. C., Moreira, C. G., Siqueira, J. O., et al.  
560       (2016). Rare earth elements in the soil environment. *Curr. Pollut. Reports* 2, 28–50.  
561       doi:10.1007/s40726-016-0026-4.
- 562   Ray, P., Girard, V., Gault, M., Job, C., Bonneau, M., Mandrand-Berthelot, M.-A., et al. (2013).  
563       *Pseudomonas putida* KT2440 response to nickel or cobalt induced stress by quantitative  
564       proteomics. *Metallomics* 5, 68–79. doi:10.1039/C2MT20147J.

- 565 Rose, R. W., Brüser, T., Kissinger, J. C., and Pohlschröder, M. (2002). Adaptation of protein  
566 secretion to extremely high-salt conditions by extensive use of the twin-arginine  
567 translocation pathway. *Mol. Microbiol.* 45, 943–950. doi:10.1046/j.1365-  
568 2958.2002.03090.x.
- 569 Roszczenko-Jasińska, P., Vu, H. N., Subuyuj, G. A., Crisostomo, R. V., Cai, J., Raghuraman, C.,  
570 et al. (2019). Lanthanide transport, storage, and beyond: genes and processes contributing to  
571 XoxF function in *Methylobacterium extorquens* AM1. *bioRxiv*, 647677. doi:10.1101/647677.
- 572 Salah El Din, A. L. M., Kyslík, P., Stephan, D., and Abdallah, M. A. (1997). Bacterial iron  
573 transport: Structure elucidation by FAB-MS and by 2D NMR (<sup>1</sup>H, <sup>13</sup>C, <sup>15</sup>N) of pyoverdinin  
574 G4R, a peptidic siderophore produced by a nitrogen-fixing strain of *Pseudomonas putida*.  
575 *Tetrahedron* 53, 12539–12552. doi:10.1016/S0040-4020(97)00773-4.
- 576 Sasnow, S. S., Wei, H., and Aristilde, L. (2016). Bypasses in intracellular glucose metabolism in  
577 iron-limited *Pseudomonas putida*. *Microbiologyopen* 5, 3–20. doi:10.1002/mbo3.287.
- 578 Schalk, I. J., and Cunrath, O. (2016). An overview of the biological metal uptake pathways in  
579 *Pseudomonas aeruginosa*. *Environ. Microbiol.* 18, 3227–3246. doi:10.1111/1462-  
580 2920.13525.
- 581 Semrau, J. D., DiSpirito, A. A., Gu, W., and Yoon, S. (2018). Metals and methanotrophy. *Appl.*  
582 *Environ. Microbiol.* 84, e02289-17. doi:10.1128/AEM.02289-17.
- 583 Silva-Rocha, R., Martínez-García, E., Calles, B., Chavarría, M., Arce-Rodríguez, A., de las  
584 Heras, A., et al. (2013). The Standard European Vector Architecture (SEVA): a coherent  
585 platform for the analysis and deployment of complex prokaryotic phenotypes. *Nucleic Acids*  
586 *Res.* 41, D666–D675. doi:10.1093/nar/gks1119.
- 587 Studier, F. W., and Moffatt, B. A. (1986). Use of bacteriophage T7 RNA polymerase to direct  
588 selective high-level expression of cloned genes. *J. Mol. Biol.* 189, 113–130.

589 doi:10.1016/0022-2836(86)90385-2.

590 Taboada, B., Estrada, K., Ciria, R., and Merino, E. (2018). Operon-mapper: a web server for  
591 precise operon identification in bacterial and archaeal genomes. *Bioinformatics*, 1–3.

592 doi:10.1093/bioinformatics/bty496.

593 Takeda, K., Matsumura, H., Ishida, T., Samejima, M., Igarashi, K., Nakamura, N., et al. (2013).

594 The two-step electrochemical oxidation of alcohols using a novel recombinant PQQ alcohol  
595 dehydrogenase as a catalyst for a bioanode. *Bioelectrochemistry* 94, 75–78.

596 doi:10.1016/j.bioelechem.2013.08.001.

597 Tottey, S., Waldron, K. J., Firbank, S. J., Reale, B., Bessant, C., Sato, K., et al. (2008). Protein-  
598 folding location can regulate manganese-binding versus copper- or zinc-binding. *Nature*

599 455, 1138–1142. doi:10.1038/nature07340.

600 Tripathi, V. N., and Srivastava, S. (2006). Ni<sup>2+</sup>-uptake in *Pseudomonas putida* strain S4: a  
601 possible role of Mg<sup>2+</sup>-uptake pump. *J. Biosci.* 31, 61–7. doi:10.1007/BF02705236.

602 Tyler, G. (2004). Rare earth elements in soil and plant systems - A review. *Plant Soil* 267, 191–  
603 206. doi:10.1007/s11104-005-4888-2.

604 Webb, M. (1970). The mechanism of acquired resistance to Co<sup>2+</sup> and Ni<sup>2+</sup> in Gram-positive and  
605 Gram-negative bacteria. *Biochim. Biophys. Acta - Gen. Subj.* 222, 440–446.

606 doi:10.1016/0304-4165(70)90134-0.

607 Wehrmann, M., Berthelot, C., Billard, P., and Klebensberger, J. (2018). The PedS2/PedR2 two-  
608 component system is crucial for the rare earth element switch in *Pseudomonas putida*

609 KT2440. *mSphere* 3, 1–12. doi:10.1128/mSphere.00376-18.

610 Wehrmann, M., Billard, P., Martin-Meriadec, A., Zegeye, A., and Klebensberger, J. (2017).

611 Functional role of lanthanides in enzymatic activity and transcriptional regulation of

612 pyrroloquinoline quinone-dependent alcohol dehydrogenases in *Pseudomonas putida*

- 613           KT2440. *MBio* 8, e00570-17. doi:10.1128/mBio.00570-17.
- 614   Wehrmann, M., Toussaint, M., Pfannstiel, J., Billard, P., and Klebensberger, J. (2019). The  
615           cellular response towards lanthanum is substrate specific and reveals a novel route for  
616           glycerol metabolism in *Pseudomonas putida* KT2440. *bioRxiv*, 567529.  
617           doi:10.1101/567529.
- 618   Wu, M. L., Wessels, J. C. T., Pol, A., Op den Camp, H. J. M., Jetten, M. S. M., and van Niftrik,  
619           L. (2015). XoxF-type methanol dehydrogenase from the anaerobic methanotroph  
620           *Candidatus Methyloirabilis oxyfera*. *Appl. Environ. Microbiol.* 81, 1442–51.  
621           doi:10.1128/AEM.03292-14.
- 622   Zobel, S., Benedetti, I., Eisenbach, L., de Lorenzo, V., Wierckx, N., and Blank, L. M. (2015).  
623           Tn7-Based Device for Calibrated Heterologous Gene Expression in *Pseudomonas putida*.  
624           *ACS Synth. Biol.* 4, 1341–1351. doi:10.1021/acssynbio.5b00058.
- 625

626 **Tables**

627

628 **Table 1:** Strains and plasmids used in the study

| Strains                                    | Relevant features                                                                                                                                                                                                                                                             | Source or reference                |
|--------------------------------------------|-------------------------------------------------------------------------------------------------------------------------------------------------------------------------------------------------------------------------------------------------------------------------------|------------------------------------|
| KT2440*                                    | KT2440 with a markerless deletion of <i>upp</i> . Parent strain for deletion mutants.                                                                                                                                                                                         | (Graf and Altenbuchner, 2011)      |
| $\Delta pedE$                              | KT2440* with a markerless deletion of <i>pedE</i>                                                                                                                                                                                                                             | (Mückschel et al., 2012)           |
| $\Delta pedA1A2BC$                         | KT2440* with a markerless deletion of <i>pedA1A2BC</i> (PP_5538, PP_2669, PP_2668, PP_2667)                                                                                                                                                                                   | This study                         |
| $\Delta pedE \Delta pedA1A2BC$             | $\Delta pedE$ with markerless deletion of gene cluster <i>pedA1A2BC</i>                                                                                                                                                                                                       | This study                         |
| $\Delta pedE \Delta pvdD$                  | $\Delta pedE$ with a markerless deletion of <i>pvdD</i> (PP_4219)                                                                                                                                                                                                             | This study                         |
| $\Delta pedH$                              | KT2440* with a markerless deletion of <i>pedH</i>                                                                                                                                                                                                                             | (Mückschel et al., 2012)           |
| $\Delta pedH \Delta pedA1A2BC$             | $\Delta pedH$ with a markerless deletion of gene cluster <i>pedA1A2BC</i>                                                                                                                                                                                                     | this study                         |
| $\Delta pedE \Delta pedH$                  | KT2440* with a markerless deletion of <i>pedE</i> and <i>pedH</i>                                                                                                                                                                                                             | (Mückschel et al., 2012)           |
| $\Delta pedE \Delta tatC1$                 | $\Delta pedE$ with a markerless deletion of <i>tatC1</i> (PP_1039)                                                                                                                                                                                                            | This study                         |
| $\Delta pedE \Delta tatC2$                 | $\Delta pedE$ with a markerless deletion of <i>tatC2</i> (PP_5018)                                                                                                                                                                                                            | This study                         |
| <i>E. coli</i> BL21 (DE3)                  | <i>F</i> <sup>-</sup> <i>ompT gal dcm lon hsdS<sub>B</sub>(r<sub>B</sub><sup>-</sup> m<sub>B</sub><sup>-</sup>)</i> $\lambda$ (DE3 [ <i>lacI lacUV5-T7 gene 1 ind1 sam7 nin5</i> ])                                                                                           | (Studier and Moffatt, 1986)        |
| <i>E. coli</i> TOP10                       | <i>F</i> <sup>-</sup> <i>mcrA</i> $\Delta$ ( <i>mrr-hsdRMS-mcrBC</i> ) $\phi$ 80 <i>lacZ</i> $\Delta$ M15 $\Delta$ <i>lacX74 nupG recA1 araD139 <math>\Delta</math>(<i>ara-leu</i>)7697 <i>galE15 galK16 rpsL(Str<sup>R</sup>) endA1</i> <math>\lambda</math><sup>-</sup></i> | Invitrogen                         |
| <i>E. coli</i> HB101                       | <i>F</i> <sup>-</sup> <i>mcrB mrr hsdS20(r<sub>B</sub><sup>-</sup> m<sub>B</sub><sup>-</sup>) recA13 leuB6 ara-14 proA2 lacY1 galK2 xyl-5 mtl-1 rpsL20(Sm<sup>R</sup>) gln V44</i> $\lambda$ <sup>-</sup>                                                                     | (Boyer and Roulland-Dussoix, 1969) |
| <i>E. coli</i> PIR2                        | <i>F</i> $\Delta$ <i>lac169 rpoS(Am) robA1 creC510 hsdR514 endA reacA1 uidA</i> ( $\Delta$ Mlui):: <i>pir</i>                                                                                                                                                                 | Invitrogen                         |
| <i>E. coli</i> CC118 $\lambda$ pir         | $\Delta$ ( <i>ara-leu</i> ) <i>araD</i> $\Delta$ <i>lacX74 galE galK phoA20 thi-1 rpsE rpoB argE(Am) recA1</i> $\lambda$ pir phage lysogen                                                                                                                                    | (Herrero et al., 1990)             |
| KT2440*:: <i>Tn7M-pedH-lux</i>             | KT2440* with insertion of <i>Tn7-M-pedH-lux</i>                                                                                                                                                                                                                               | This study                         |
| $\Delta pedA1A2BC$ :: <i>Tn7M-pedH-lux</i> | $\Delta pedA1A2BC$ with insertion of <i>Tn7-M-pedH-lux</i>                                                                                                                                                                                                                    | This study                         |
| KT2440*:: <i>Tn7M-pedE-lux</i>             | KT2440* with insertion of <i>Tn7-M-pedE-lux</i>                                                                                                                                                                                                                               | This study                         |
| <b>Plasmids</b>                            |                                                                                                                                                                                                                                                                               |                                    |
| pJOE6261.2                                 | Suicide vector for gene deletions                                                                                                                                                                                                                                             | (Graf and Altenbuchner, 2011)      |
| pMW10                                      | pJeM1 based vector for rhamnose inducible expression of <i>PedH</i> with C-terminal 6x His-tag                                                                                                                                                                                | (Wehrmann et al., 2017)            |

|                 |                                                                                                                                             |                            |
|-----------------|---------------------------------------------------------------------------------------------------------------------------------------------|----------------------------|
| pMW50           | pJOE6261.2 based deletion vector for gene <i>pvdD</i> (PP_4219)                                                                             | This study                 |
| pMW57           | pJOE6261.2 based deletion vector for gene cluster <i>pedA1A2BC</i>                                                                          | This study                 |
| pTn7-M          | Km <sup>R</sup> Gm <sup>R</sup> , <i>ori R6K</i> , <i>Tn7L</i> and <i>Tn7R</i> extremities, standard multiple cloning site, <i>oriT</i> RP4 | (Zobel et al., 2015)       |
| pRK600          | Cm <sup>R</sup> , <i>ori ColE1</i> , Tra <sup>+</sup> Mob <sup>+</sup> of RK2                                                               | (Keen et al., 1988)        |
| pTNS1           | Ap <sup>R</sup> , <i>ori R6K</i> , <i>TnSABC+D</i> operon                                                                                   | (Choi et al., 2005)        |
| pSEVA226        | Km <sup>R</sup> , <i>ori RK2</i> , reporter vector harboring the <i>luxCDABE</i> operon                                                     | (Silva-Rocha et al., 2013) |
| pSEVA226-pedH   | pSEVA226 with a <i>pedH-luxCDABE</i> fusion                                                                                                 | This study                 |
| pSEVA226-pedE   | pSEVA226 with a <i>pedE-luxCDABE</i> fusion                                                                                                 | This study                 |
| pTn7-M-pedH-lux | pTn7-M with a <i>pedH-luxCDABE</i> fusion                                                                                                   | This study                 |
| pTn7-M-pedE-lux | pTn7-M with a <i>pedE-luxCDABE</i> fusion                                                                                                   | This study                 |

629

630



631 **Table 2:** Primers used in the study

| <b>Primer</b> |                                                             |                              |
|---------------|-------------------------------------------------------------|------------------------------|
| <b>Name</b>   | <b>Sequence 5' → 3'</b>                                     | <b>Annealing temperature</b> |
| MWH56         | GCCGCTTTGGTCCC GGCCACCGGCGAGTTGCA                           | 60°C                         |
| MWH57         | CCCGAAAGCTTGAACATCTCCTACCAGGGC                              | 60°C                         |
| MWH58         | ATGTTCAAGCTTTCGGGGCCG                                       | 60°C                         |
| MWH59         | GCAGGTCGACTCTAGAGCTTACAGATGCTGCTGCAG                        | 60°C                         |
| MWH94         | GCCGCTTTGGTCCC GCAACAACGCCAGGCCAC                           | 60°C                         |
| MWH95         | GCCAGGTTTAAACACACTCCACGGCAGATGG                             | 60°C                         |
| MWH96         | AGTGTGTTAAACCTGGCGTGTAACCCG                                 | 60°C                         |
| MWH97         | GCAGGTCGACTCTAGAGCCAGGGAGGTTGCTATGC                         | 60°C                         |
| PBtatC1.1     | CGATGGCCGCTTTGGTCCC GCCCATCCGTGCATGCCT                      | 66°C                         |
| PBtatC1.2     | CGATGGCCGCTTTGGTCCC GCCCATCCGTGCATGCCT                      | 66°C                         |
| PBtatC1.3     | AAAATGCTTCGGCCCTTTCGCGGGCGTG                                | 72°C                         |
| PBtatC1.4     | CCTGCAGGTCGACTCTAGAGGGCCATGCCGAGTTCG                        | 72°C                         |
| PBtatC2.1     | CGATGGCCGCTTTGGTCCC GGGAGTACGAAATGGGT<br>ATCTTTGACTGGAAACAC | 72°C                         |
| PBtatC2.2     | AGCAACAGGTGGGGCTCGCGGCGGTTGA                                | 72°C                         |
| PBtatC2.3     | CGCGAGCCCCACCTGTTGCTTCTTGAAGAGG                             | 62°C                         |
| PBtatC2.4     | CCTGCAGGTCGACTCTAGAGATCACCCAGCTGTACC                        | 62°C                         |

632

633

634 **Table 3:** Trace element concentrations of M9 medium and MP medium.

|                                                                                   | <b>M9 medium</b> | <b>MP medium</b> |
|-----------------------------------------------------------------------------------|------------------|------------------|
| <b>Na<sub>3</sub>-citrate</b>                                                     | 51 $\mu$ M       | 45.6 $\mu$ M     |
| <b>H<sub>3</sub>BO<sub>3</sub></b>                                                | 5 $\mu$ M        | -                |
| <b>CoCl<sub>2</sub></b>                                                           | -                | 2 $\mu$ M        |
| <b>CuSO<sub>4</sub></b>                                                           | 4 $\mu$ M        | 1 $\mu$ M        |
| <b>FeSO<sub>4</sub></b>                                                           | 36 $\mu$ M       | 18 $\mu$ M       |
| <b>MnCl<sub>2</sub></b>                                                           | 5 $\mu$ M        | 1 $\mu$ M        |
| <b>NaMoO<sub>4</sub>/(NH<sub>4</sub>)<sub>6</sub>Mo<sub>7</sub>O<sub>24</sub></b> | 0.137 $\mu$ M    | 2 $\mu$ M        |
| <b>NiCl<sub>2</sub></b>                                                           | 0.084 $\mu$ M    | -                |
| <b>Na<sub>2</sub>WO<sub>4</sub></b>                                               | -                | 0.33 $\mu$ M     |
| <b>ZnSO<sub>4</sub></b>                                                           | 7 $\mu$ M        | 1.2 $\mu$ M      |

635

636

637 **Figures**

638 **Figure 1:** Growth of strain  $\Delta pedE$  (**A**, dots) and  $\Delta pedH$  (**B**, squares) in 1 mL liquid M9 medium  
639 in 96-well deep-well plates with 5 mM 2-phenylethanol and various concentrations of  $La^{3+}$  in the  
640 presence (orange) or absence (blue) of trace element solution (TES).  $OD_{600}$  was determined upon  
641 48 h of incubation at 30°C and 350 rpm. Data are presented as the mean values of biological  
642 triplicates and error bars represent the corresponding standard deviations.

643  
644 **Figure 2:** **A)** Growth of  $\Delta pedE$  in 1 mL liquid M9 medium in 96-well deep-well plates with 5  
645 mM 2-phenylethanol and 10 nM  $La^{3+}$  in the presence of trace element solution (TES) or  
646 individual components thereof. **B)** Growth of  $\Delta pedE$  as described in **A** with and without the  
647 additional supplementation of 50  $\mu M$   $Na_3$ -citrate.  $OD_{600}$  was determined upon 48 h of incubation  
648 at 30°C and 350 rpm. Data are presented as the mean values of biological triplicates and error  
649 bars represent the corresponding standard deviations. \*Probes with 137 nM  $NaMoO_4$  also contain  
650 5  $\mu M$   $H_3BO_3$  and 84 nM  $NiSO_4$ .

651  
652 **Figure 3:** (**A** and **B**) Growth of  $\Delta pedE$  (blue squares) and  $\Delta pedE \Delta pvdD$  (light blue diamonds) in  
653 1 mL liquid M9 medium in 96-well deep-well plates without TES with 5 mM 2-phenylethanol  
654 and various concentrations of  $FeSO_4$  in the presence of 10 nM  $La^{3+}$  (**A**) or 10  $\mu M$   $La^{3+}$  (**B**).  $OD_{600}$   
655 was determined upon 48 h of incubation at 30°C and 350 rpm. Data are presented as the mean  
656 values of biological triplicates and error bars represent the corresponding standard deviations. (**C**)  
657 Pyoverdine production by strains  $\Delta pedE$  (left) and  $\Delta pedE \Delta pvdD$  (right) grown on cetrimide agar  
658 plates examined under blue light.

659

660 **Figure 4:** Activities of the *pedE* promoter (blue bars) in strain KT2440\* during incubation in M9  
661 medium with 2-phenylethanol, no TES and 10 nM (A) or 10  $\mu\text{M}$   $\text{La}^{3+}$  (B) as well as different  
662  $\text{FeSO}_4$  concentrations. Promoter activities were determined upon 8 h of incubation at 600 rpm  
663 and 30°C. Growth of strain  $\Delta pedH$  (orange dots) in M9 medium with 2-phenylethanol, no TES  
664 and 10 nM (A) or 10  $\mu\text{M}$  (B)  $\text{La}^{3+}$  as well as different  $\text{FeSO}_4$  concentrations. Cells were  
665 incubated for 48 h in 96 deep-well plates at 30°C and 350 rpm prior to  $\text{OD}_{600}$  measurements.  
666 Data are presented as the mean values of biological triplicates and error bars represent the  
667 corresponding standard deviations.

668  
669 **Figure 5: A)** Genomic organization of the *ped* cluster in *P. putida* KT2440. Nomenclature in  
670 analogy to *P. putida* U as suggested by Arias *et al.* (Arias *et al.*, 2008) **B)** Growth of  $\Delta pedH$ ,  
671  $\Delta pedH \Delta pedA1A2BC$ ,  $\Delta pedE$ , and  $\Delta pedE \Delta pedA1A2BC$  strains in liquid M9 medium with TES  
672 and 5 mM phenylacetaldehyde (orange bars) or 5 mM phenylacetic acid (green bars) and either 0  
673  $\mu\text{M}$   $\text{La}^{3+}$  (dark green and dark orange bars) or 100  $\mu\text{M}$   $\text{La}^{3+}$  (light green and light orange bars).  
674  $\text{OD}_{600}$  was determined upon 48 h of incubation at 30°C and 180 rpm. Data are presented as the  
675 mean values of biological triplicates and error bars represent the corresponding standard  
676 deviations.

677  
678 **Figure 6:** Growth of strains  $\Delta pedE \Delta pedA1A2BC$  (A and B, triangles) and  $\Delta pedH \Delta pedA1A2BC$   
679 (C, diamonds) in liquid M9 medium with 5 mM 2-phenylethanol with (orange) or without (blue)  
680 TES and various concentrations of  $\text{La}^{3+}$ . Pale circles and squares represent the growth of  $\Delta pedE$   
681 and  $\Delta pedH$  parental strains. Growth of strains  $\Delta pedE$  and  $\Delta pedH$  in A) and C) represents the  
682 restated data from Figure 1 for better comparability. **D)** Growth of strain  $\Delta pedE \Delta pedH$   
683  $\Delta pedA1A2BC$  harboring plasmid pMW10 (light orange triangles) in liquid M9 medium with 5

684 mM 2-phenylethanol, 20  $\mu\text{g/ml}$  kanamycin, TES and various  $\text{La}^{3+}$  concentrations.  $\text{OD}_{600}$  was  
685 determined upon 48 h (**A** and **C**) or 120 h (**B** and **D**) of incubation at  $30^\circ\text{C}$  and 350 rpm. Data are  
686 presented as the mean values of biological triplicates, and error bars represent the corresponding  
687 standard deviations.

688  
689 **Figure 7:** **A)** Promoter activities of the *pedH* promoter in the KT2440\* and  $\Delta\text{pedA1A2BC}$   
690 background during incubation with 2-phenylethanol in presence (orange) or absence (blue) of 10  
691  $\mu\text{M}$   $\text{La}^{3+}$ . Promoter activities were determined upon 3 h of incubation at 600 rpm and  $30^\circ\text{C}$ . **B)**  
692 Growth of strain  $\Delta\text{pedE}$   $\Delta\text{pedA1A2BC}$  on 2-phenylethanol in presence (orange) or absence (blue)  
693 of 10  $\mu\text{M}$   $\text{La}^{3+}$ .  $\text{OD}_{600}$  was determined upon 48 h of incubation at  $30^\circ\text{C}$  and 180 rpm.  
694 Experiments were conducted in presence of TES. Data are presented as the mean values of  
695 biological triplicates and error bars represent the corresponding standard deviations.

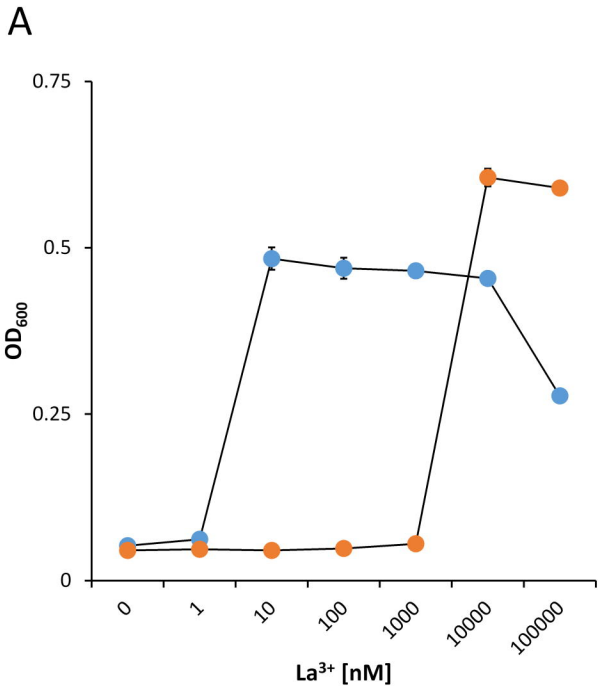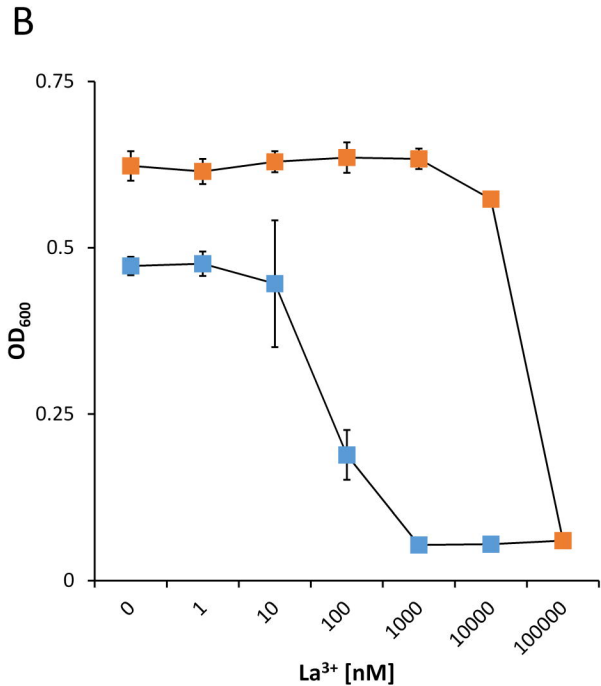

**A**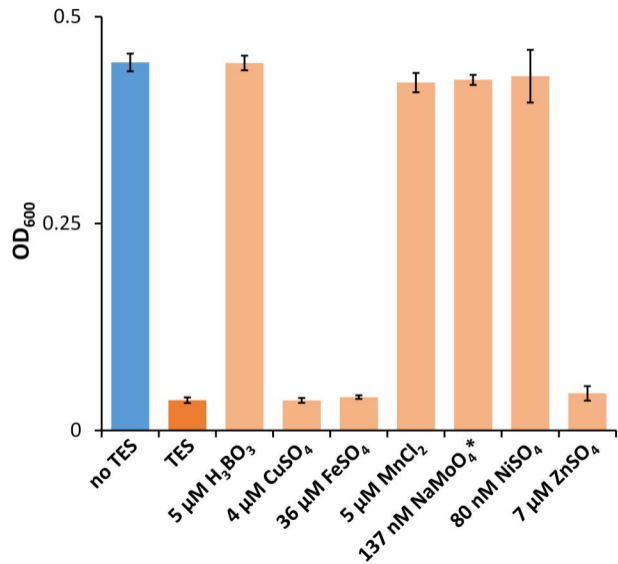**B**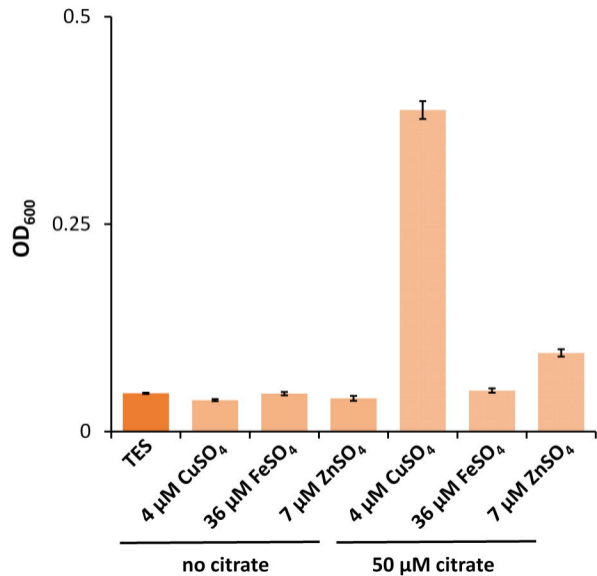

**A**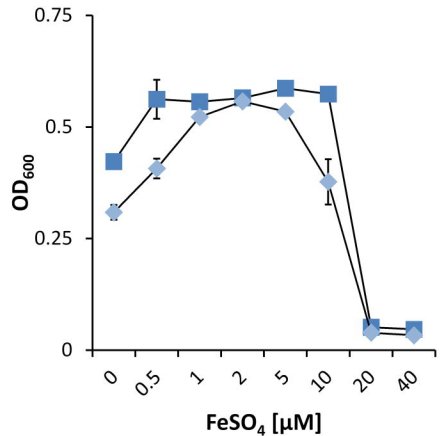**B**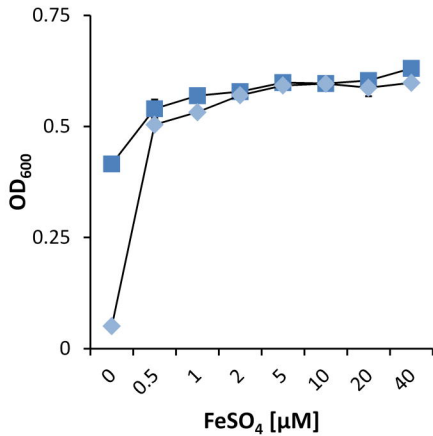**C**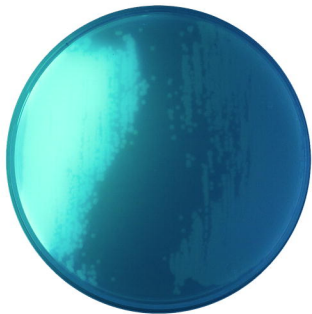



**A**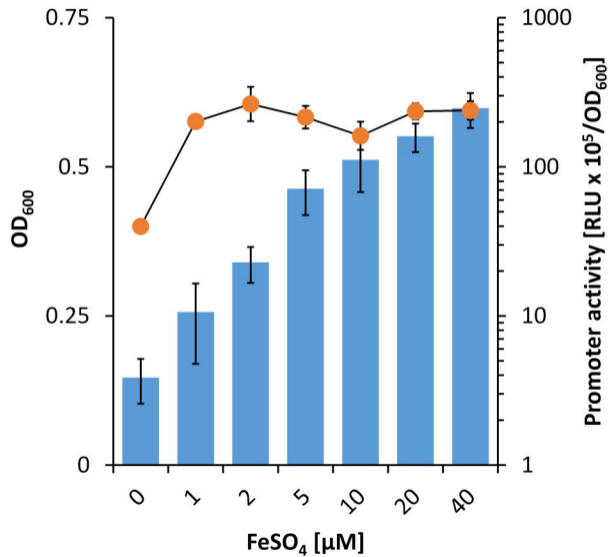**B**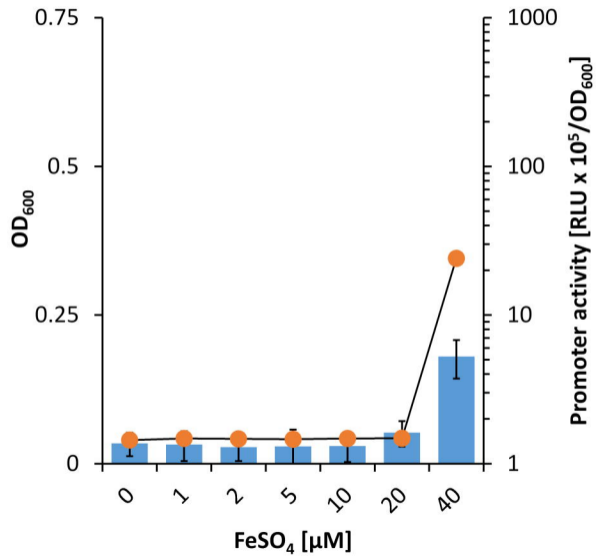

A

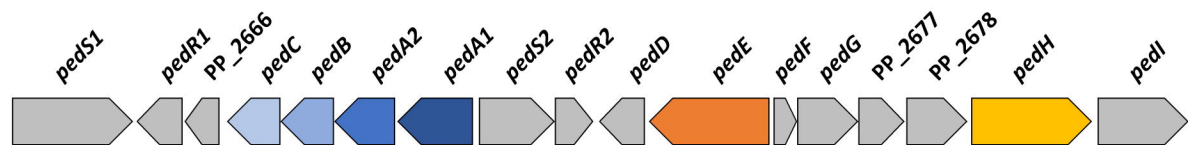

B

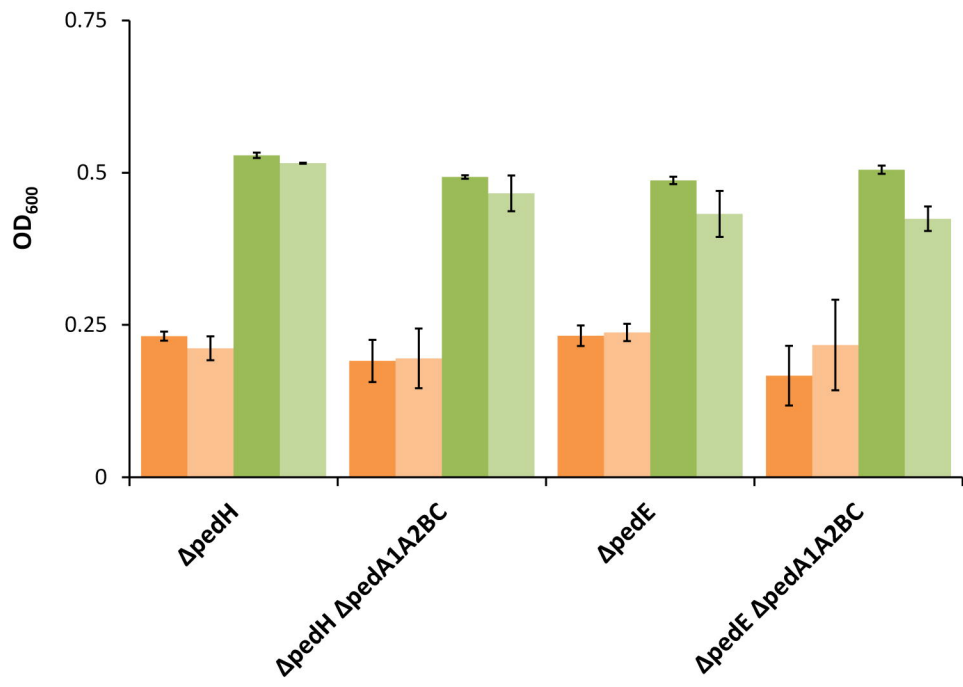

48 h

A

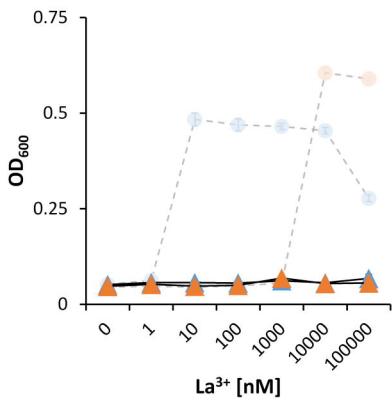

120 h

B

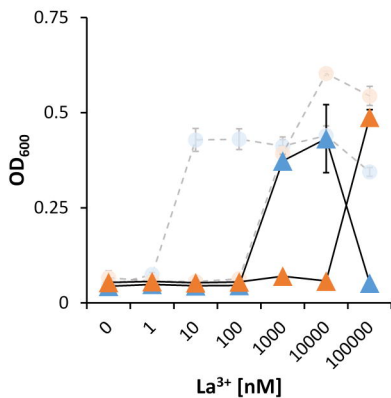

C

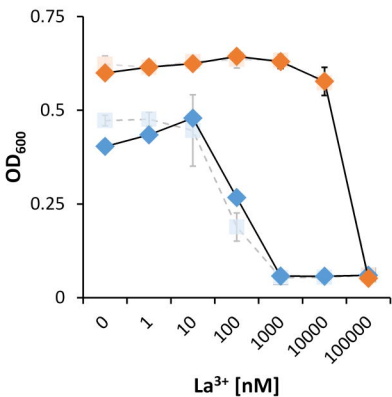

D

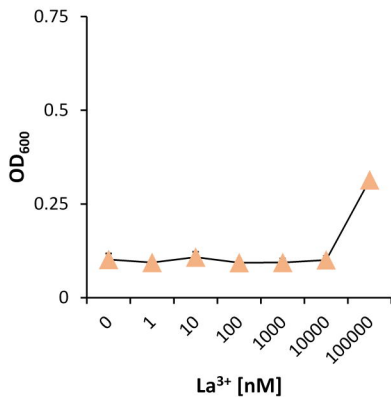

**A**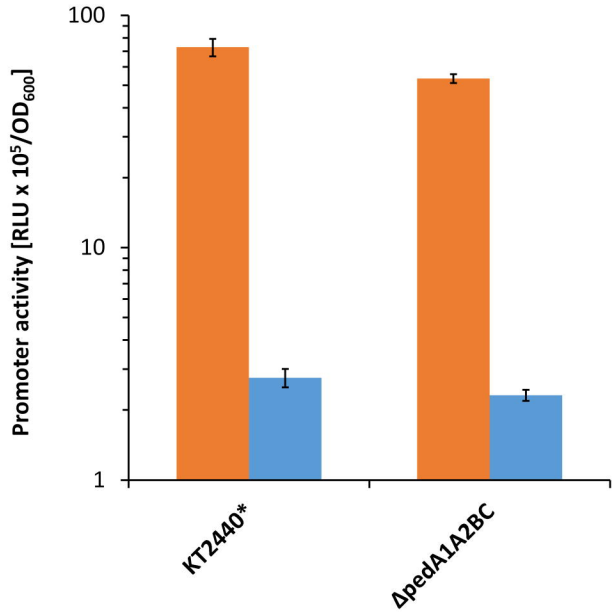**B**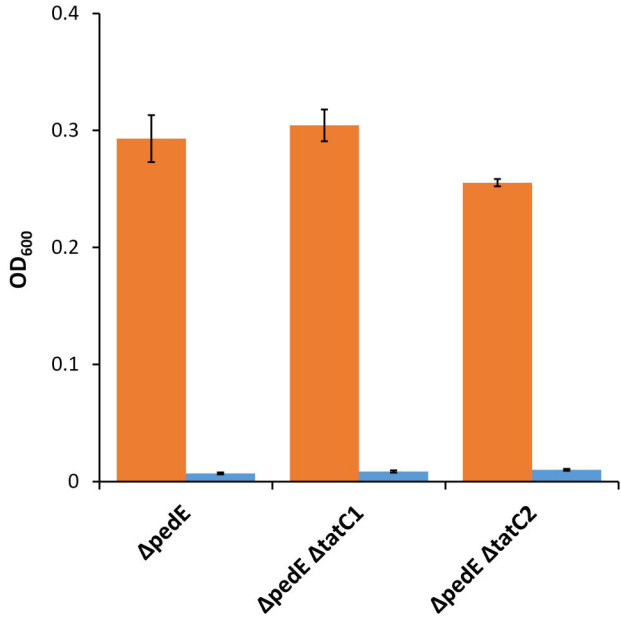

Source: http://biorxiv.org/content/10.1101/670216v1.full.pdf
